# Supplementary material
Source: PubMed Central journal article supplement (PMC8758801)
Supplement: NIHMS1724466-supplement-1.pdf [file NIHMS1724466-supplement-1.pdf]

## The Bidirectional Link Between Sleep Disturbances and Traumatic Brain Injury Symptoms: A Role for Glymphatic Dysfunction?

### *Supplemental Information*

**Supplementary Table S1.** Classification of TBI severity.\*

| <b>Criteria</b>                                                          | <b>Mild</b>    | <b>Moderate</b>                             | <b>Severe</b> |
|--------------------------------------------------------------------------|----------------|---------------------------------------------|---------------|
| <b>Structural Imaging</b>                                                | Normal         | Normal or abnormal                          |               |
| <b>Loss of Consciousness</b>                                             | 0-30 min       | >30 min and < 24 hours                      | >24 hours     |
| <b>Alteration of consciousness/mental state</b>                          | Up to 24 hours | >24 hours; severity based on other criteria |               |
| <b>Posttraumatic amnesia</b>                                             | 0-1 day        | >1 and <7 days                              | >7 days       |
| <b>Glasgow Coma Scale (GCS) (best available score in first 24 hours)</b> | 13-15          | 9-12                                        | <9            |

\* Adapted from the VA/DoD Clinical Practice guideline for the Management of Concussion-mild Traumatic Brain Injury (1).

1. (2009): VA/DoD Clinical Practice Guideline for Management of Concussion/Mild Traumatic Brain Injury. *Journal of rehabilitation research and development*. 46:Cp1-68.
